# Supplementary material for: Understanding the Evolution of Mammalian Brain Structures; the Need for a (New) Cerebrotype Approach
Source: PubMed Central journal article supplement (PMC4061787; doi:10.3390/brainsci2020203), 2012-05-18
Supplement: brainsci-02-00203-s001.pdf [file brainsci-02-00203-s001.pdf]

## Supplementary Information

**Figure S1.** Phylogenetic Principal Component Analysis of Hipposideridae's brain structure proportions. Regression on independent contrasts of logged absolute brain size onto independent contrasts of position on PC1: Multiple R-squared: 0.621, F-statistic: 29.54 on 1 and 18 DF,  $P = 3.654 \times 10^{-5}$ ; PC2: Multiple R-squared: 0.173, F-statistic: 3.771 on 1 and 18 DF,  $P = 0.06795$ .

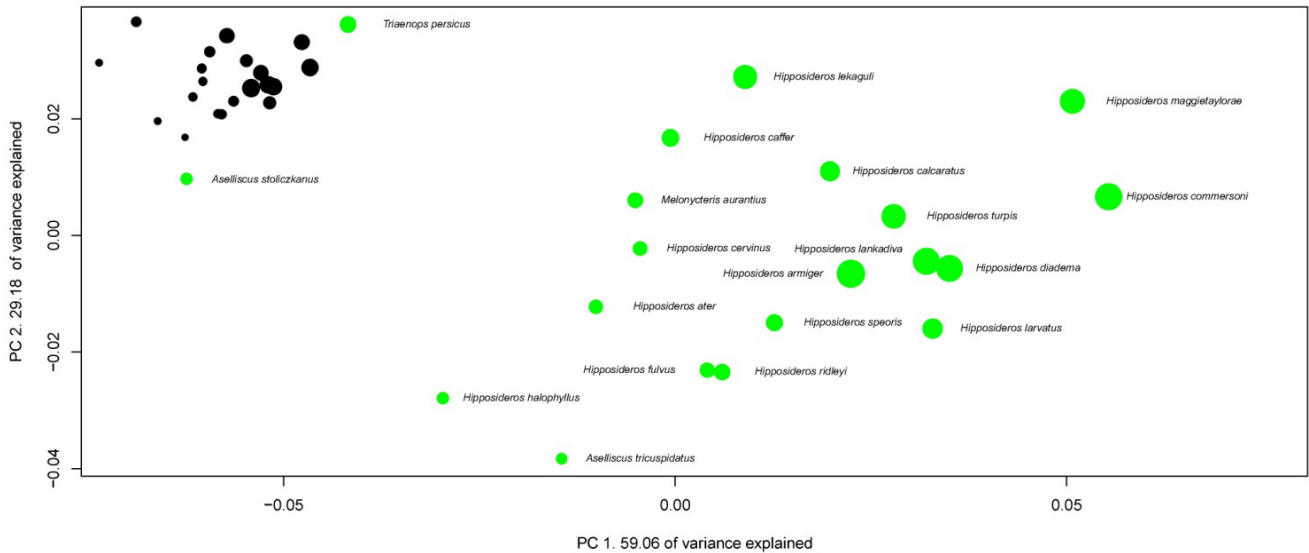

**Figure S2.** Phylogenetic Principal Component Analysis of Molossidae's brain structure proportions. Regression on independent contrasts of logged absolute brain size onto independent contrasts of position on PC1: Multiple R-squared: 0.0221, F-statistic: 0.3384 on 1 and 15 DF,  $P = 0.5694$ ; PC2: Multiple R-squared: 0.705, F-statistic: 35.86 on 1 and 15 DF,  $P = 2.486 \times 10^{-5}$ .

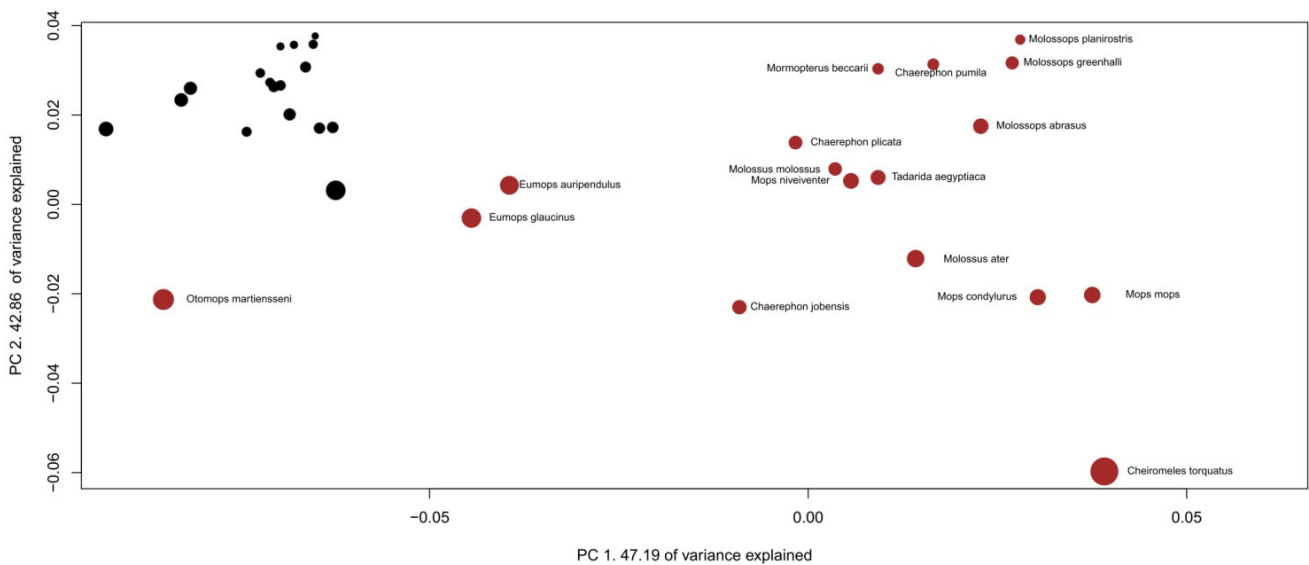

**Figure S3.** Phylogenetic Principal Component Analysis of Emballonuridae's brain structure proportions. Regression on independent contrasts of logged absolute brain size onto independent contrasts of position on PC1: Multiple R-squared: 0.0095, F-statistic: 0.1437 on 1 and 15 DF,  $P = 0.71$ ; PC2: Multiple R-squared: 0.4503, F-statistic: 12.29 on 1 and 15 DF,  $P = 0.003189$ .

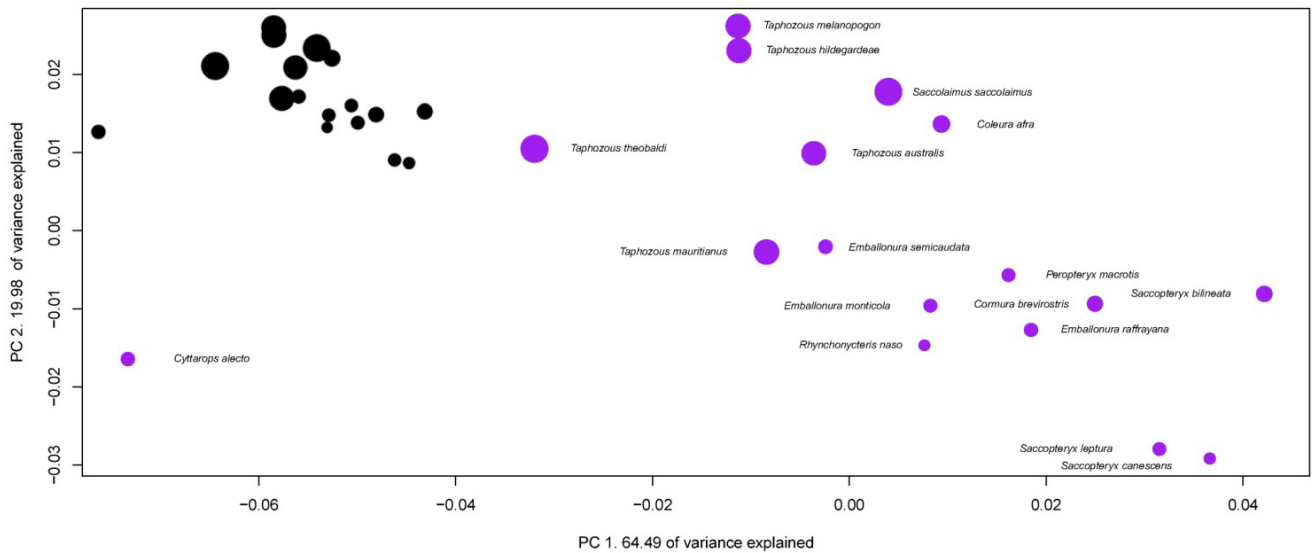

**Figure S4.** Phylogenetic Principal Component Analysis of Phyllostomidae's brain structure proportions. Regression on independent contrasts of logged absolute brain size onto independent contrasts of position on PC1: Multiple R-squared: 0.0770, F-statistic: 4.006 on 1 and 48 DF,  $P = 0.051$ ; PC2: Multiple R-squared: 0.1223, F-statistic: 6.69 on 1 and 48 DF,  $P = 0.01278$ .

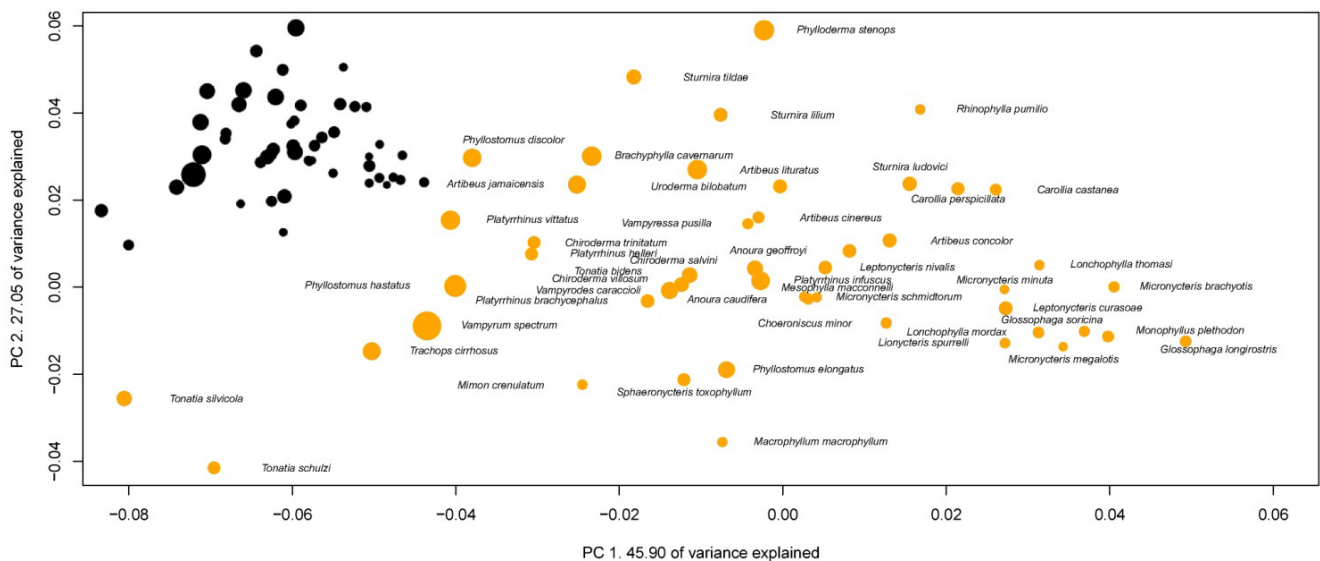

**Table S1.** Loadings of the brain structures for the five first principal components of PPCA for each taxon of the Figures S1 to S4. Scores higher than 0.5 are highlighted in grey.

|                | PC 1          | PC 2          | PC 3          | PC 4         | PC 5           |               | PC 1          | PC 2          | PC 3         | PC 4         | PC 5         |
|----------------|---------------|---------------|---------------|--------------|----------------|---------------|---------------|---------------|--------------|--------------|--------------|
|                | <b>45.897</b> | <b>27.050</b> | <b>15.118</b> | <b>5.943</b> | <b>1.960</b>   | % variance    | <b>47.191</b> | <b>42.858</b> | <b>4.430</b> | <b>1.749</b> | <b>1.416</b> |
| Phyllostomidae | 0.138         | -0.834        | -0.462        | 0.008        | -0.160         | Medulla       | 0.203         | 0.906         | 0.247        | -0.194       | -0.049       |
|                | 0.308         | -0.492        | 0.809         | 0.086        | -0.012         | Cerebellum    | -0.997        | -0.074        | 0.011        | 0.016        | -0.001       |
|                | 0.045         | -0.792        | -0.442        | 0.155        | 0.351          | Mesencephalon | 0.238         | 0.805         | 0.467        | 0.152        | 0.054        |
|                | -0.219        | -0.356        | -0.463        | -0.003       | -0.280         | Diencephalon  | 0.720         | 0.097         | -0.069       | 0.062        | 0.551        |
|                | -0.176        | 0.399         | -0.210        | -0.026       | -0.506         | Striatum      | 0.411         | -0.365        | -0.493       | 0.103        | 0.479        |
|                | 0.409         | 0.514         | -0.236        | -0.325       | -0.117         | Septum        | 0.428         | 0.286         | -0.631       | -0.121       | 0.126        |
|                | 0.483         | 0.740         | -0.148        | 0.394        | -0.040         | Paleocortex   | 0.611         | 0.408         | -0.119       | 0.531        | -0.337       |
|                | 0.661         | 0.363         | 0.025         | -0.635       | 0.096          | Hippocampus   | 0.510         | 0.438         | -0.571       | -0.215       | -0.240       |
|                | 0.210         | 0.556         | 0.051         | -0.511       | 0.028          | Schizocortex  | -0.089        | 0.236         | 0.026        | -0.679       | -0.268       |
|                | -0.991        | 0.092         | 0.083         | -0.018       | 0.021          | Neocortex     | 0.226         | -0.964        | 0.135        | -0.016       | -0.027       |
| 0.412          | 0.798         | 0.057         | 0.304         | 0.129        | Olfactory bulb | 0.498         | -0.187        | -0.691        | 0.013        | -0.043       |              |
|                | PC 1          | PC 2          | PC 3          | PC 4         | PC 5           |               | PC 1          | PC 2          | PC 3         | PC 4         | PC 5         |
|                | <b>64.493</b> | <b>19.982</b> | <b>6.350</b>  | <b>4.209</b> | <b>1.994</b>   | % variance    | <b>59.057</b> | <b>29.180</b> | <b>4.883</b> | <b>3.152</b> | <b>2.435</b> |
| Emballonuridae | -0.321        | -0.485        | 0.743         | -0.323       | 0.030          | Medulla       | -0.788        | -0.453        | 0.348        | 0.211        | 0.065        |
|                | -0.993        | 0.080         | -0.036        | 0.065        | 0.031          | Cerebellum    | -0.669        | 0.742         | -0.008       | -0.034       | 0.021        |
|                | 0.223         | -0.920        | -0.305        | -0.024       | 0.041          | Mesencephalon | -0.530        | -0.643        | 0.210        | -0.503       | -0.029       |
|                | 0.399         | -0.587        | -0.458        | -0.039       | 0.220          | Diencephalon  | 0.506         | -0.677        | -0.206       | -0.261       | 0.124        |
|                | 0.339         | 0.239         | 0.234         | 0.255        | -0.230         | Striatum      | 0.512         | -0.388        | -0.577       | -0.215       | 0.307        |
|                | 0.639         | -0.009        | 0.172         | 0.260        | -0.344         | Septum        | 0.124         | -0.714        | -0.330       | -0.171       | -0.188       |
|                | 0.902         | 0.271         | 0.119         | 0.238        | 0.187          | Paleocortex   | 0.721         | -0.475        | -0.335       | 0.147        | 0.292        |
|                | 0.506         | -0.204        | 0.104         | -0.108       | -0.693         | Hippocampus   | -0.565        | -0.353        | -0.453       | 0.167        | -0.551       |
|                | 0.521         | 0.376         | -0.065        | 0.510        | -0.426         | Schizocortex  | 0.172         | -0.200        | 0.059        | 0.444        | -0.605       |
|                | 0.283         | 0.785         | -0.313        | -0.451       | -0.003         | Neocortex     | 0.933         | 0.310         | 0.171        | -0.017       | -0.057       |
| 0.203          | 0.650         | 0.141         | -0.177        | 0.363        | Olfactory bulb | 0.760         | 0.263         | -0.157        | 0.299        | 0.371        |              |
